# Supplementary material
Source: PubMed Central journal article supplement (PMC4869922)
Supplement: PulmCirc-006-181.s001.pdf [file PulmCirc-006-181.s001.pdf]

## **Appendix from Lungu et al., “Diagnosis of pulmonary hypertension from magnetic resonance imaging–based computational models and decision tree analysis”**

**(Pulm. Circ., vol. 6, no. 2, p. 181)**

### **Imaging parameters**

MPA imaging parameters: (1) phase contrast (PC): 40 cardiac phases, electrocardiogram gated, matrix dimensions  $256 \times 128$ , field of view  $480 \text{ mm} \times 288 \text{ mm}$ , slice thickness 10 mm, repetition time 5.85 milliseconds, echo time 2.87 milliseconds, velocity encoding 150 cm/s, arrhythmia rejection 10%; (2) bSSFP: 40 cardiac phases, electrocardiogram gated, matrix dimensions  $256 \times 128$ , field of view  $480 \text{ mm} \times 288 \text{ mm}$ , slice thickness 10 mm, repetition time 3.73 milliseconds, echo time 1.62 milliseconds, bandwidth 125 kHz.

Cardiac short-axis MRI: bSSFP: repetition time 2.8 milliseconds; echo time 1.0 milliseconds, flip angle  $50^\circ$ , matrix dimensions  $256 \times 256$ , field of view  $48 \text{ mm} \times 43.2 \text{ mm}$ , bandwidth 125 kHz, slice thickness 8–10 mm.

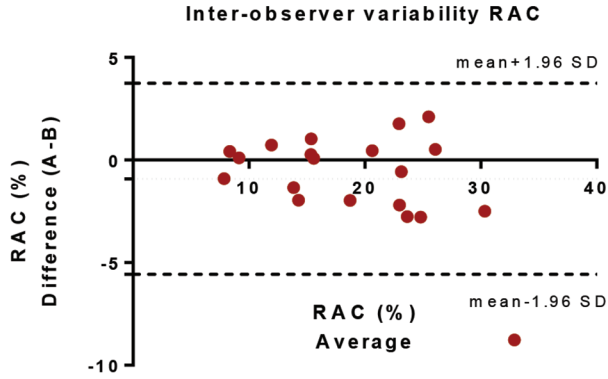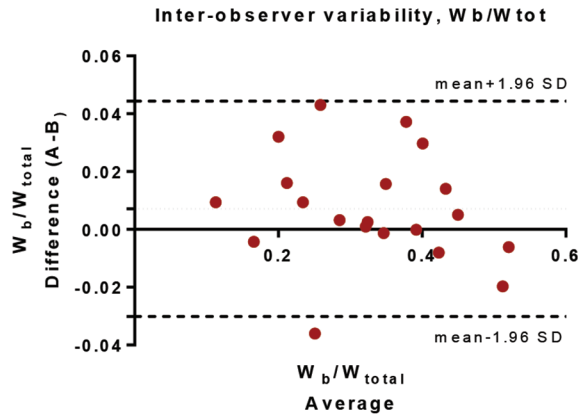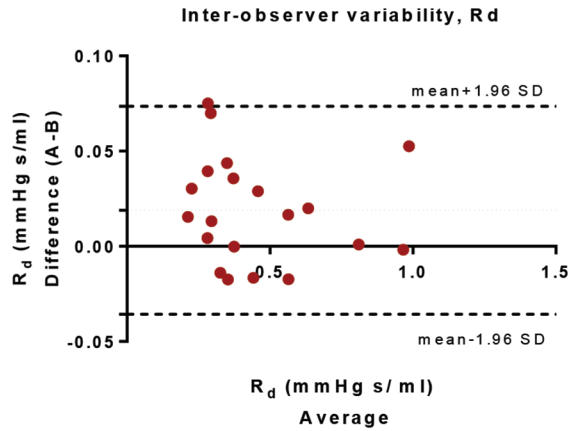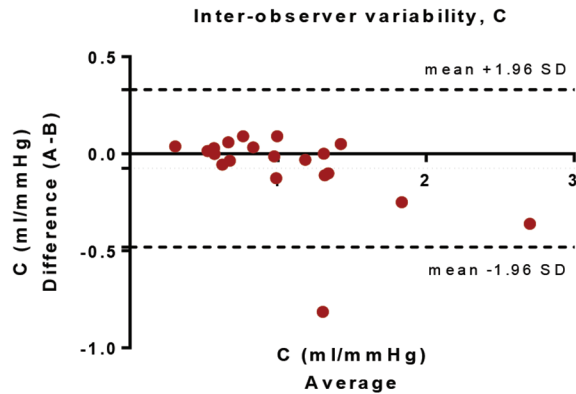

Figure A1. Interobserver variability. Bland-Altman analysis for relative area change (RAC), ratio of wave power ( $W_b/W_{tot}$ ), distal resistance ( $R_d$ ), and pulmonary compliance ( $C$ ) performed on 20 cases selected at random (using MATLAB) from the 72-patient cohort.

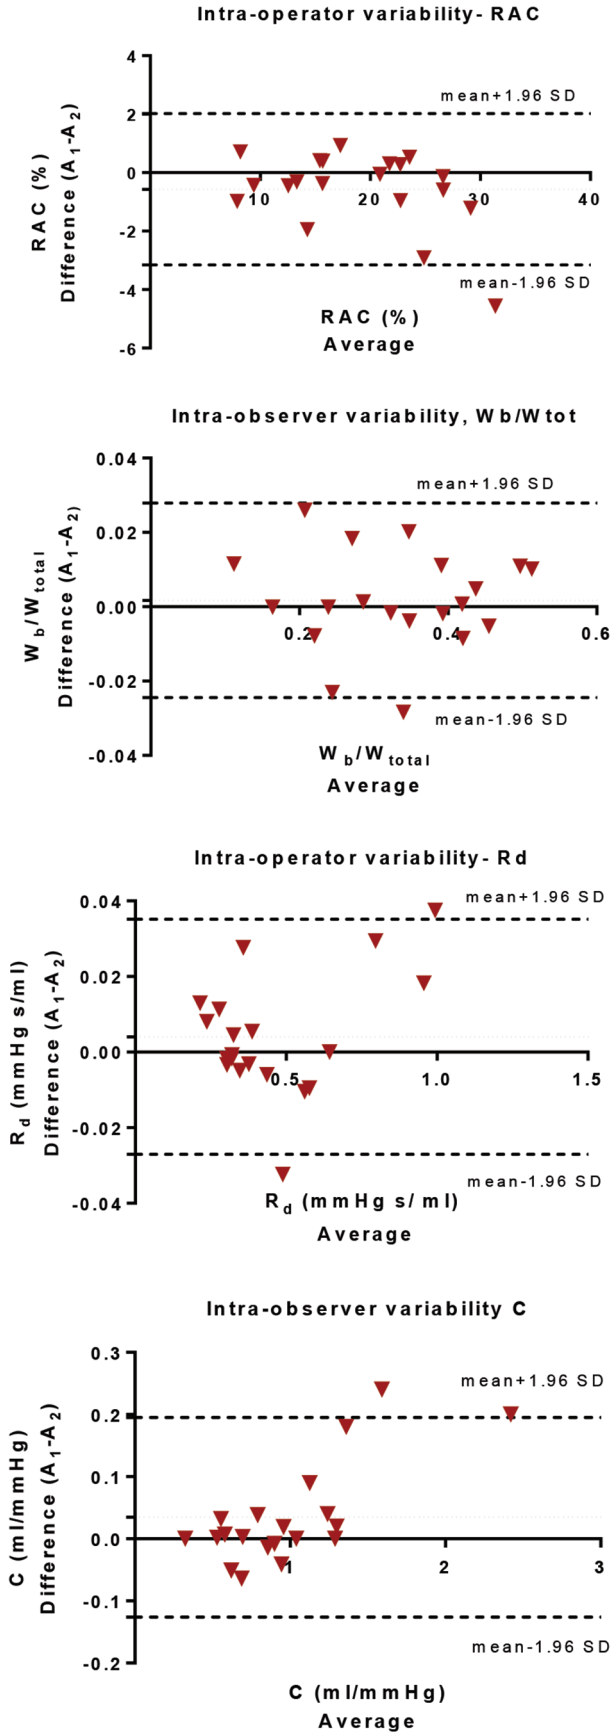

Table A1. Bias and limits of agreement for the intra- and interoperator variability

| Variable          | Intraoperator |            |               | Interoperator |            |                |
|-------------------|---------------|------------|---------------|---------------|------------|----------------|
|                   | Bias          | SD of bias | 95% CI        | Bias          | SD of bias | 95% CI         |
| RAC, %            | -0.57         | 1.32       | -3.16 to 2.02 | -0.91         | 2.38       | -5.56 to 3.74  |
| $W_b/W_{tot}$     | 0.002         | 0.01       | -0.03 to 0.03 | 0.007         | 0.019      | -0.03 to 0.044 |
| $R_d$ , mmHg s/mL | 0.004         | 0.02       | -0.03 to 0.04 | 0.019         | 0.027      | -0.04 to 0.073 |
| $C$ , mL/mmHg     | 0.034         | 0.08       | -0.13 to 0.19 | -0.07         | 0.206      | -0.48 to 0.331 |

Note: SD: standard deviation; CI: confidence interval; RAC: relative area change;  $W_b/W_{tot}$ : ratio of wave power;  $R_d$ : distal resistance;  $C$ : pulmonary compliance.

Figure A2. Intraobserver variability. Bland-Altman analysis for relative area change (RAC), ratio of wave power ( $W_b/W_{tot}$ ), distal resistance ( $R_d$ ), and pulmonary compliance ( $C$ ) performed on 20 cases selected at random (using MATLAB) from the 72-patient cohort.

Table A2. Intraclass correlation coefficients (ICCs) using a 2-way mixed model for consistency and absolute agreement

| Variable and model type | Intraoperator |             | Interoperator |             |        |             |
|-------------------------|---------------|-------------|---------------|-------------|--------|-------------|
|                         | A1, A2        |             | A1, B1        |             | A2, B1 |             |
|                         | ICC           | 95% CI      | ICC           | 95% CI      | ICC    | 95% CI      |
| RAC (%)                 |               |             |               |             |        |             |
| Consistency             | 0.982         | 0.956–0.993 | 0.943         | 0.858–0.977 | 0.96   | 0.903–0.984 |
| Absolute agreement      | 0.98          | 0.947–0.992 | 0.943         | 0.858–0.977 | 0.9    | 0.903–0.984 |
| $W_b/W_{tot}$           |               |             |               |             |        |             |
| Consistency             | 0.993         | 0.982–0.997 | 0.986         | 0.965–0.994 | 0.987  | 0.966–0.995 |
| Absolute agreement      | 0.993         | 0.983–0.997 | 0.985         | 0.961–0.994 | 0.986  | 0.966–0.994 |
| $R_d$ , mmHg s/mL       |               |             |               |             |        |             |
| Consistency             | 0.998         | 0.994–0.999 | 0.993         | 0.82–0.997  | 0.992  | 0.98–0.997  |
| Absolute agreement      | 0.998         | 0.994–0.999 | 0.99          | 0.959–0.997 | 0.99   | 0.971–0.996 |
| C, mL/mmHg              |               |             |               |             |        |             |
| Consistency             | 0.985         | 0.962–0.994 | 0.931         | 0.834–0.972 | 0.901  | 0.768–0.96  |
| Absolute agreement      | 0.983         | 0.955–0.993 | 0.926         | 0.821–0.97  | 0.887  | 0.719–0.955 |

Note:  $P < 0.001$ . CI: confidence interval; RAC: relative area change;  $W_b/W_{tot}$ : ratio of wave power;  $R_d$ : distal resistance; C: pulmonary compliance.
